# Supplementary material
Source: PubMed Central journal article supplement (PMC3873801)
Supplement: NIHMS526701-supplement-01.pdf [file NIHMS526701-supplement-01.pdf]

## Supplementary Material

### *Estimation of Odds Ratio From Mean and Standard Deviations*

Although most studies reported OR as a categorical variable (binary, tertiles, quartiles), some others reported the mean and standard deviation of cases and controls along with an OR for each unit change in exposure (or adiposity) (eg, for each 1-cm/5-cm increase in WC, for each 1-cm<sup>2</sup> increase in visceral adipose tissue surface area, or for each decimal unit (0.1) increase in WHR). For studies in which OR was not reported as a categorical variable, we estimated the OR from mean, standard deviation, and sample size of the cases and controls. This was performed by using the equation below, which has been validated for use in meta-analysis when combining results from studies that report ORs and mean differences in continuous outcomes<sup>19</sup>:

$$\ln OR = \frac{\pi}{\sqrt{3}} \times SMD$$

where lnOR is the logarithm of OR, and SMD is the standardized mean difference in cases and controls.

We validated this approach by comparing the magnitude of association between these 2 types of studies and testing for interaction. Because of differences in exposure definitions and reporting (visceral adipose tissue area reported in cm<sup>2</sup>, WHR reported as a ratio, and WC reported in cm) and significant differences in the inherent range and distribution of these measures (as well as differences in reporting OR, either as per 1-unit change, per 5-unit change, or per 10-unit change), we could not perform a meta-analysis of OR for each unit change in exposure. Instead, we performed a sensitivity analysis of such studies for each measure of adiposity and each esophageal disease outcome (reported in [Supplementary Table 3](#)). (Note that all studies that reported OR in this manner also reported OR as categories and/or as means and standard deviations).

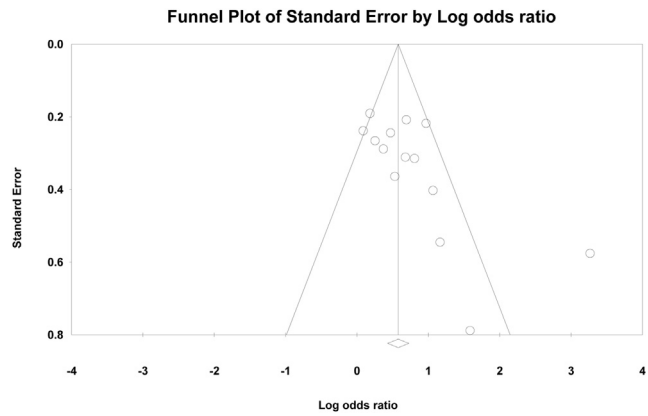

**Supplementary Figure 1.** Funnel plot asymmetry seen in studies on patients with BE.

**Supplementary Table 1.** Newcastle-Ottawa Scale for Assessment of Quality of Included Studies: Case-control Studies

| Quality assessment criteria                      | Acceptable(*)                                                                                                                                                                                                                                                                                                  | Anderson <sup>13</sup> | Beddy <sup>55</sup> | Chua <sup>27</sup> | Chung <sup>28</sup> | Corley <sup>9</sup> | Corley <sup>56</sup> | Edelstein <sup>10,45</sup> | El-Serag <sup>46</sup> | Greer <sup>51</sup> | Healy <sup>47</sup> | Kendall <sup>49</sup> | Kramer <sup>53,54</sup> | Lee <sup>33,34</sup> | Mokrowiecka <sup>35</sup> | Mulholland <sup>36</sup> | Nelsen <sup>16</sup> | Park <sup>38</sup> | Rubenstein <sup>50</sup> | Rubenstein <sup>11</sup> | Wu <sup>40</sup> |
|--------------------------------------------------|----------------------------------------------------------------------------------------------------------------------------------------------------------------------------------------------------------------------------------------------------------------------------------------------------------------|------------------------|---------------------|--------------------|---------------------|---------------------|----------------------|----------------------------|------------------------|---------------------|---------------------|-----------------------|-------------------------|----------------------|---------------------------|--------------------------|----------------------|--------------------|--------------------------|--------------------------|------------------|
| <b>Selection</b>                                 |                                                                                                                                                                                                                                                                                                                |                        |                     |                    |                     |                     |                      |                            |                        |                     |                     |                       |                         |                      |                           |                          |                      |                    |                          |                          |                  |
| Is the case definition adequate?                 | Yes, with independent validation                                                                                                                                                                                                                                                                               | *                      | *                   | *                  | *                   | *                   | *                    | *                          | *                      | *                   | *                   | *                     | *                       | —                    | —                         | *                        | *                    | *                  | *                        | *                        | *                |
| Representativeness of cases?                     | Consecutive or obviously representative series of cases                                                                                                                                                                                                                                                        | *                      | *                   | *                  | *                   | *                   | *                    | *                          | *                      | *                   | *                   | *                     | *                       | *                    | —                         | *                        | —                    | —                  | *                        | *                        | *                |
| Selection of controls?                           | Community controls                                                                                                                                                                                                                                                                                             | *                      | —                   | —                  | —                   | *                   | *                    | *                          | —                      | —                   | —                   | *                     | —                       | *                    | —                         | *                        | *                    | —                  | —                        | —                        | —                |
| Definition of controls?                          | No history of EE/BE/EAC                                                                                                                                                                                                                                                                                        | *                      | *                   | *                  | *                   | *                   | *                    | —                          | *                      | *                   | *                   | *                     | *                       | —                    | *                         | *                        | *                    | *                  | *                        | *                        | *                |
| <b>Comparability</b>                             |                                                                                                                                                                                                                                                                                                                |                        |                     |                    |                     |                     |                      |                            |                        |                     |                     |                       |                         |                      |                           |                          |                      |                    |                          |                          |                  |
| Study controls for age/sex                       | Yes                                                                                                                                                                                                                                                                                                            | *                      | *                   | *                  | *                   | *                   | *                    | *                          | —                      | *                   | —                   | *                     | *                       | *                    | *                         | *                        | *                    | *                  | *                        | *                        | *                |
| Study controls for at least 3 additional factors | Race, BMI, smoking, alcohol, GERD or reflux symptoms, PPI use, hiatal hernia, family history of outcome, caffeine intake, <i>Helicobacter pylori</i> infection<br>For studies on BE: medication use (aspirin/NSAIDs/PPIs/statins)<br>For studies on EAC: presence of BE, length of BE segment, histology of BE | *                      | —                   | —                  | *                   | *                   | *                    | *                          | —                      | —                   | —                   | *                     | *                       | *                    | —                         | *                        | *                    | *                  | *                        | *                        | *                |
| <b>Exposure</b>                                  |                                                                                                                                                                                                                                                                                                                |                        |                     |                    |                     |                     |                      |                            |                        |                     |                     |                       |                         |                      |                           |                          |                      |                    |                          |                          |                  |
| Ascertainment of exposure?                       | Secure record, structured interview by healthcare practitioner, blinded to case/control status                                                                                                                                                                                                                 | —                      | *                   | —                  | —                   | —                   | *                    | —                          | *                      | *                   | —                   | *                     | —                       | *                    | —                         | —                        | *                    | —                  | —                        | —                        | *                |
| Same method of ascertainment of cases/controls?  | Yes                                                                                                                                                                                                                                                                                                            | *                      | *                   | *                  | *                   | *                   | *                    | *                          | *                      | *                   | *                   | *                     | *                       | —                    | *                         | *                        | *                    | *                  | *                        | *                        | *                |

Supplementary Table 1. Continued

| Quality assessment criteria         | Acceptable(*)        | Anderson <sup>13</sup> | Beddy <sup>55</sup> | Chua <sup>27</sup> | Chung <sup>28</sup> | Corley <sup>9</sup> | Corley <sup>56</sup> | Edelstein <sup>10,45</sup> | El-Serag <sup>46</sup> | Greer <sup>51</sup> | Healy <sup>47</sup> | Kendall <sup>49</sup> | Kramer <sup>53,54</sup> | Lee <sup>33,34</sup> | Mokrowiecka <sup>35</sup> | Mulholland <sup>36</sup> | Nelsen <sup>16</sup> | Park <sup>38</sup> | Rubenstein <sup>50</sup> | Rubenstein <sup>11</sup> | Wu <sup>40</sup> |
|-------------------------------------|----------------------|------------------------|---------------------|--------------------|---------------------|---------------------|----------------------|----------------------------|------------------------|---------------------|---------------------|-----------------------|-------------------------|----------------------|---------------------------|--------------------------|----------------------|--------------------|--------------------------|--------------------------|------------------|
| Non-response rate?                  | Same for both groups | —                      | —                   | —                  | —                   | *                   | —                    | —                          | —                      | —                   | —                   | *                     | —                       | *                    | —                         | —                        | *                    | —                  | *                        | *                        | *                |
| Overall study quality (maximum = 9) |                      | 7                      | 6                   | 5                  | 6                   | 8                   | 8                    | 6                          | 5                      | 6                   | 4                   | 9                     | 6                       | 6                    | 3                         | 7                        | 8                    | 5                  | 7                        | 7                        | 8                |

NOTE. Each asterisk represents if individual criterion within the subsection was fulfilled.

NSAIDs, nonsteroidal anti-inflammatory drugs; PPIs, proton pump inhibitors.

**Supplementary Table 2.** Newcastle-Ottawa Scale for Assessment of Quality of Included Studies: Cohort and Cross-sectional Studies

| Quality assessment criteria                                               | Acceptable(*)                                                                                                                                                                                                                                                                                                  | Akiyama <sup>44</sup> | Gunji <sup>29</sup> | Ha <sup>30</sup> | Hsu <sup>31</sup> | Jacobson <sup>48</sup> | Kang <sup>41</sup> | Kato <sup>42</sup> | Koo <sup>32</sup> | Lee <sup>43</sup> | MaInnis <sup>57</sup> | Nam <sup>37</sup> | Nam <sup>12</sup> | O'Dpherty <sup>58</sup> | Rubenstein <sup>52</sup> | Sogabe <sup>14</sup> | Steffen <sup>59</sup> | Tai <sup>39</sup> |   |
|---------------------------------------------------------------------------|----------------------------------------------------------------------------------------------------------------------------------------------------------------------------------------------------------------------------------------------------------------------------------------------------------------|-----------------------|---------------------|------------------|-------------------|------------------------|--------------------|--------------------|-------------------|-------------------|-----------------------|-------------------|-------------------|-------------------------|--------------------------|----------------------|-----------------------|-------------------|---|
| <b>Selection</b>                                                          |                                                                                                                                                                                                                                                                                                                |                       |                     |                  |                   |                        |                    |                    |                   |                   |                       |                   |                   |                         |                          |                      |                       |                   |   |
| Representativeness of exposed cohort?                                     | Representative of average adult in community (age/sex/being at risk of disease)                                                                                                                                                                                                                                | —                     | —                   | —                | —                 | —                      | —                  | *                  | —                 | —                 | *                     | —                 | —                 | *                       | —                        | —                    | *                     | —                 |   |
| Selection of the nonexposed cohort?                                       | Drawn from same community as exposed cohort                                                                                                                                                                                                                                                                    | *                     | *                   | *                | *                 | *                      | *                  | *                  | *                 | *                 | *                     | *                 | *                 | *                       | *                        | *                    | *                     | *                 | * |
| Ascertainment of exposure?                                                | Secured records, structured interview                                                                                                                                                                                                                                                                          | *                     | *                   | *                | *                 | —                      | *                  | *                  | *                 | *                 | *                     | *                 | *                 | *                       | *                        | *                    | *                     | *                 | * |
| Demonstration that outcome of interest was not present at start of study? | Only incident cases of outcome                                                                                                                                                                                                                                                                                 | —                     | —                   | —                | —                 | *                      | —                  | —                  | *                 | —                 | *                     | —                 | —                 | *                       | —                        | —                    | *                     | —                 |   |
| <b>Comparability</b>                                                      |                                                                                                                                                                                                                                                                                                                |                       |                     |                  |                   |                        |                    |                    |                   |                   |                       |                   |                   |                         |                          |                      |                       |                   |   |
| Study controls for age/sex?                                               | Yes                                                                                                                                                                                                                                                                                                            | *                     | *                   | *                | *                 | *                      | *                  | —                  | *                 | —                 | *                     | *                 | *                 | *                       | *                        | *                    | *                     | *                 | * |
| Study controls for at least 3 additional risk factors?                    | Race, BMI, smoking, alcohol, GERD or reflux symptoms, PPI use, hiatal hernia, family history of outcome, caffeine intake, <i>Helicobacter pylori</i> infection<br>For studies on BE: Medication use (aspirin/NSAIDs/PPIs/statins)<br>For studies on EAC: presence of BE, length of BE segment, histology of BE | —                     | *                   | *                | *                 | —                      | *                  | —                  | *                 | —                 | *                     | *                 | *                 | *                       | *                        | *                    | *                     | *                 | * |
| <b>Outcome</b>                                                            |                                                                                                                                                                                                                                                                                                                |                       |                     |                  |                   |                        |                    |                    |                   |                   |                       |                   |                   |                         |                          |                      |                       |                   |   |
| Assessment of outcome?                                                    | Independent blinded assessment, record linkage                                                                                                                                                                                                                                                                 | *                     | *                   | *                | *                 | *                      | *                  | *                  | —                 | *                 | —                     | *                 | *                 | *                       | *                        | *                    | —                     | *                 |   |

**Supplementary Table 2.** Continued

| Quality assessment criteria                     | Acceptable(*)                                                                | Akiyama <sup>44</sup> | Gunji <sup>29</sup> | Ha <sup>30</sup> | Hsu <sup>31</sup> | Jacobson <sup>48</sup> | Kang <sup>41</sup> | Kato <sup>42</sup> | Koo <sup>32</sup> | Lee <sup>43</sup> | MacInnis <sup>57</sup> | Nam <sup>37</sup> | Nam <sup>12</sup> | O'Dpherty <sup>58</sup> | Rubenstein <sup>52</sup> | Sogabe <sup>14</sup> | Steffen <sup>59</sup> | Tai <sup>39</sup> |
|-------------------------------------------------|------------------------------------------------------------------------------|-----------------------|---------------------|------------------|-------------------|------------------------|--------------------|--------------------|-------------------|-------------------|------------------------|-------------------|-------------------|-------------------------|--------------------------|----------------------|-----------------------|-------------------|
| Was follow-up long enough for outcome to occur? | Follow-up >3 y                                                               | —                     | —                   | —                | —                 | *                      | —                  | —                  | *                 | —                 | *                      | —                 | —                 | *                       | —                        | —                    | *                     | —                 |
| Adequacy of follow-up of cohorts?               | Complete follow-up, or subjects lost to follow-up unlikely to introduce bias | —                     | —                   | —                | —                 | *                      | —                  | —                  | —                 | —                 | *                      | —                 | —                 | —                       | —                        | —                    | *                     | —                 |
| Overall quality of studies (maximum = 9)        |                                                                              | 4                     | 5                   | 5                | 5                 | 6                      | 5                  | 4                  | 6                 | 3                 | 8                      | 5                 | 5                 | 8                       | 5                        | 5                    | 8                     | 5                 |

NOTE. Each asterisk represents if individual criterion within the subsection was fulfilled. Note that cross-sectional studies were treated as cohort studies for quality assessment. NSAIDs, nonsteroidal anti-inflammatory drugs; PPIs, proton pump inhibitors.

**Supplementary Table 3.** Sensitivity Analysis of Studies That Reported ORs per Unit Change in Exposure

|                                  | No. of studies | Unit                                                                                   | OR             | 95% CI                     |
|----------------------------------|----------------|----------------------------------------------------------------------------------------|----------------|----------------------------|
| <b>EE</b>                        |                |                                                                                        |                |                            |
| Visceral adipose tissue area     | 1              | Per 1-cm <sup>2</sup> increase                                                         | 1.001          | 1.000–1.002                |
| Subcutaneous adipose tissue area | 1              | Per 1-cm <sup>2</sup> increase                                                         | 0.999          | 0.997–1.001                |
| WC                               | 3              | Per 1-cm increase                                                                      | 1.021          | 1.007–1.035                |
| BMI                              | 2              | Per 1-kg/m <sup>2</sup> increase                                                       | 1.062          | 1.029–1.095                |
| <b>BE</b>                        |                |                                                                                        |                |                            |
| Visceral adipose tissue area     | 2              | Per 1-cm <sup>2</sup> increase (1 study);<br>per 10-cm <sup>2</sup> increase (1 study) | 1.007<br>1.077 | 1.000–1.015<br>1.070–1.151 |
| BMI                              | 2              | Per 1-kg/m <sup>2</sup> increase                                                       | 1.015          | 0.935–1.103                |
| <b>EAC</b>                       |                |                                                                                        |                |                            |
| WC                               | 2              | Per 1-cm increase (1 study);<br>per 10-cm increase (1 study)                           | 1.100<br>1.460 | 1.032–1.172<br>1.047–2.035 |
| WHR                              | 1              | Per 0.1-unit increase                                                                  | 1.590          | 0.935–2.704                |
| BMI                              | 1              | Per 1-kg/m <sup>2</sup> increase                                                       | 1.090          | 0.981–1.211                |
